# Supplementary material for: Contribution of Signal Transducer and Activator of Transcription 3 (STAT3) to Bone Development and Repair
Source: MDPI journal article supplement (doi:10.3390/ijms25010389), 2023-12-27
Supplement: s1 [file s1]

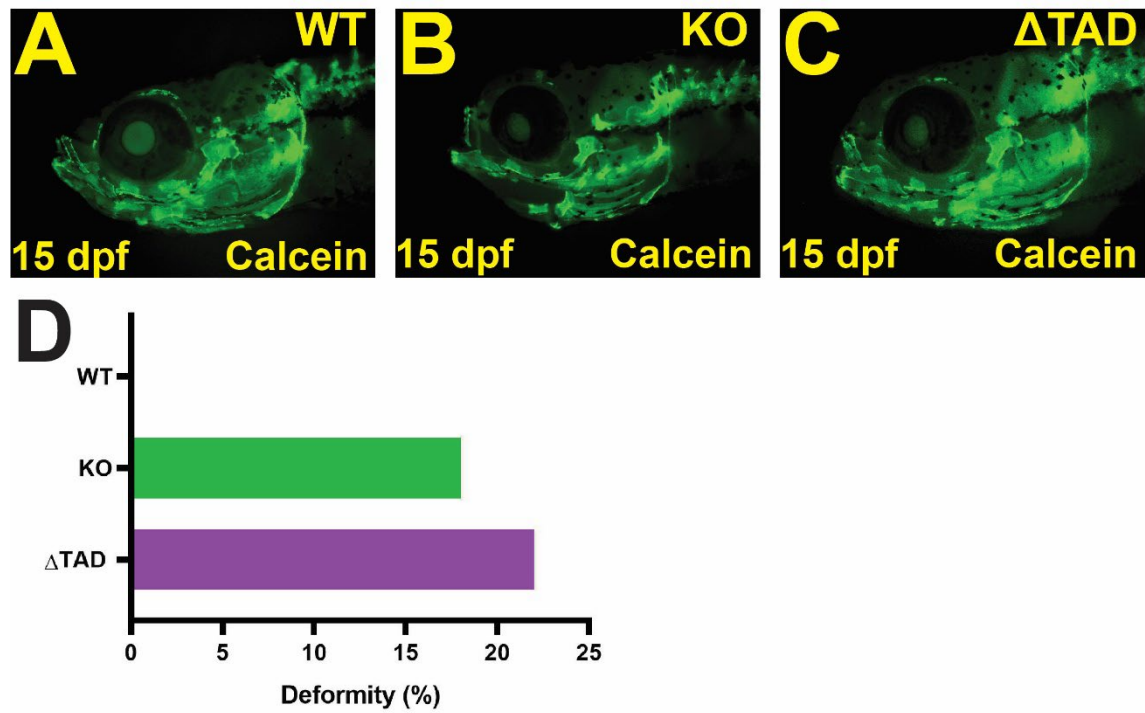

**Supplementary Figure S1.** Jaw deformity in Stat3 mutants. Calcein staining of Stat3 wildtype (WT: A), knockout (KO: B) and transactivation domain truncation ( $\Delta$ TAD: C) mutants at 15 dpf, with quantification of jaw deformity frequency in each genotype (D).

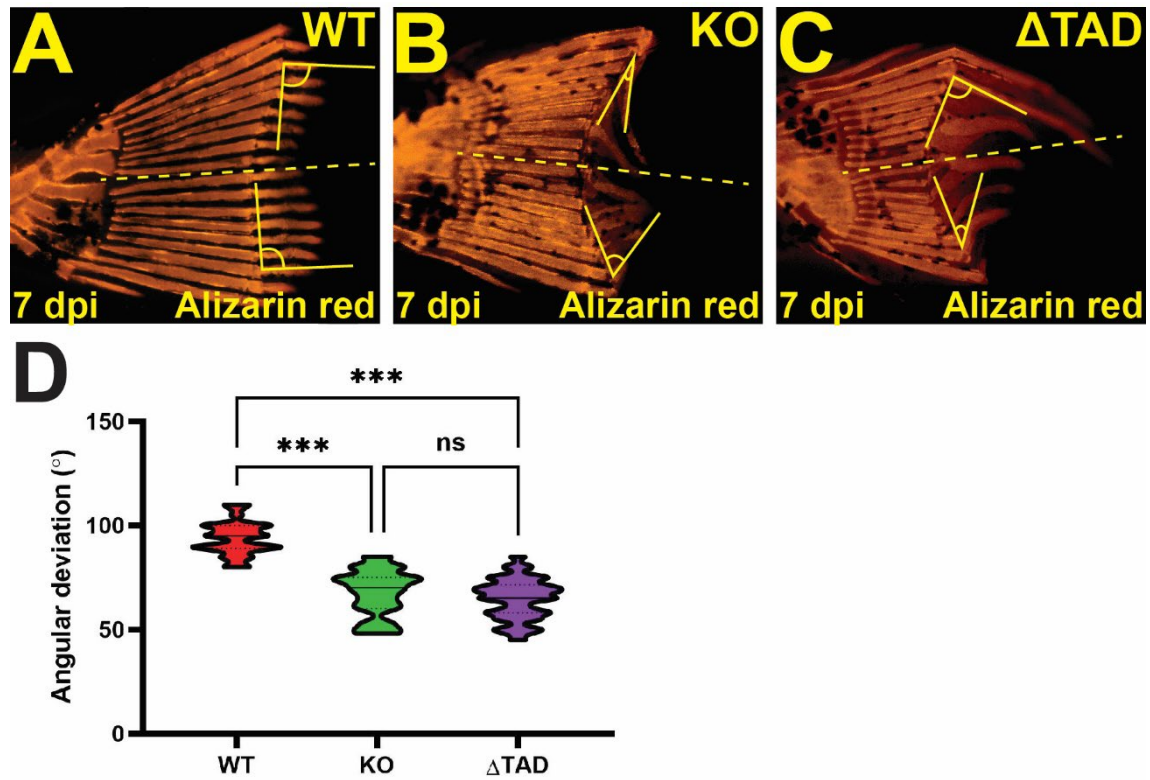

**Supplementary Figure S2.** Aberrant regeneration following caudal fin amputation in Stat3 mutants. Representative images of amputated caudal fin of juvenile Stat3 wildtype (WT: A), knockout (KO: B) and transactivation domain truncation ( $\Delta$ TAD: C) zebrafish stained with Alizarin red at 7 dpi. (D) Quantitation of the angular deviation of regenerating fin rays presented as a Violin plot with median and range of angles presented, along with indication of statistical significance (\*\* $p < 0.001$ , ns: not significant).

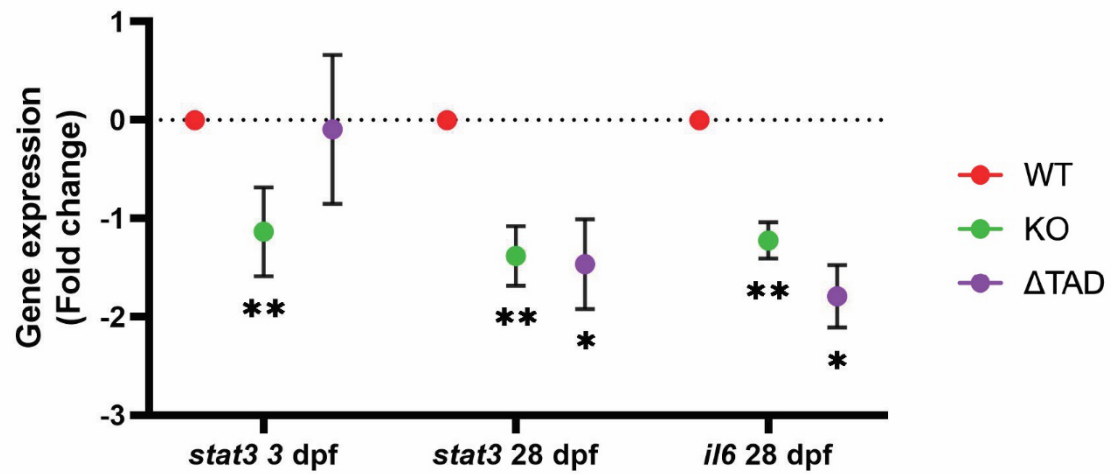

**Supplementary Figure S3.** Gene expression analysis in Stat3 mutants. Quantitation of expression for the indicated genes at the timepoints shown for Stat3 wildtype (WT), knockout (KO) and transactivation domain truncation ( $\Delta$ TAD) mutants, presented as fold-change (log2) relative to WT, showing mean and SEM with statistical significance compared to WT (\*\*  $p < 0.01$ , \*  $p < 0.05$ ).
